# Supplementary material for: In situ chemical measurement of individual cloud residue particles at a mountain site, South China
Source: Copernicus journal article supplement (doi:10.5194/acp-2017-23), 2017-02-14
Supplement: Supplementary file 1 [file acp-2017-23-supplement.pdf]

1 **Supplementary Material:**

2 **In situ chemical measurement of individual cloud residual particles at a**  
3 **mountain site, South China**

4 Qinhao Lin<sup>1,2</sup>, Guohua Zhang<sup>1</sup>, Long Peng<sup>1,2</sup>, Xinhui Bi<sup>1,\*</sup>, Xinming Wang<sup>1</sup>, Fred J.  
5 Brechtel<sup>3</sup>, Mei Li<sup>4</sup>, Duohong Chen<sup>5</sup>, Ping'an Peng<sup>1</sup>, Guoying Sheng<sup>1</sup>, Zhen Zhou<sup>4</sup>

6

7 <sup>1</sup> State Key Laboratory of Organic Geochemistry and Guangdong Key Laboratory of  
8 Environmental Protection and Resources Utilization, Guangzhou Institute of Geochemistry,  
9 Chinese Academy of Sciences, Guangzhou, 510640, PR China

10 <sup>2</sup> University of Chinese Academy of Sciences, Beijing, 100049, PR China

11 <sup>3</sup> Brechtel Manufacturing Inc., Hayward, 94544, California, USA

12 <sup>4</sup> Atmospheric Environment Institute of Safety and Pollution Control, Jinan University,  
13 Guangzhou 510632, PR China

14 <sup>5</sup> State Environmental Protection Key Laboratory of Regional Air Quality Monitoring,  
15 Guangdong Environmental Monitoring Center, Guangzhou 510308, PR China

16

17 \* Correspondence to: Xinhui Bi (bixh@gig.ac.cn)

18 Tel: +86-20-85290195

19

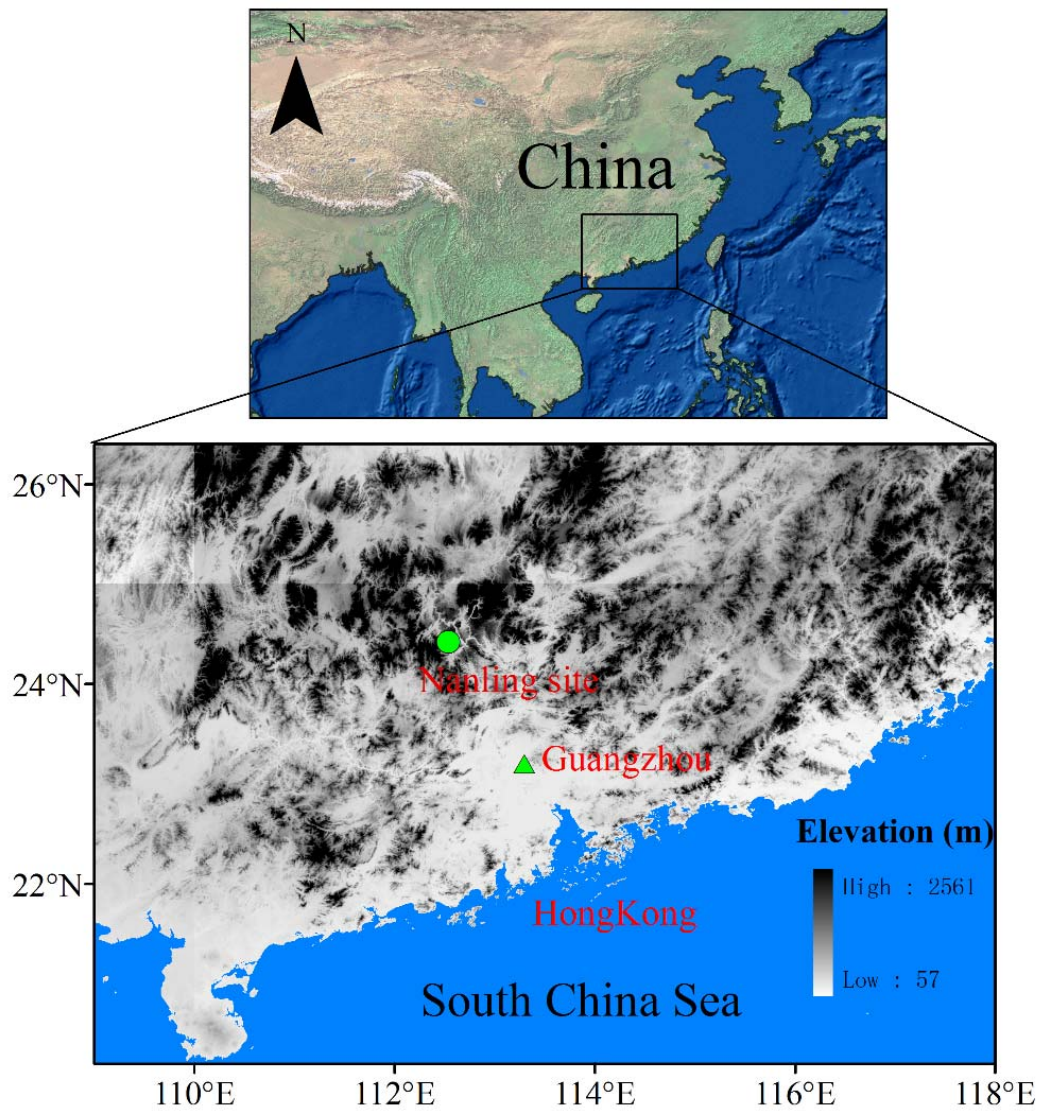

20

21 Figure S1: The map for the study site.

22

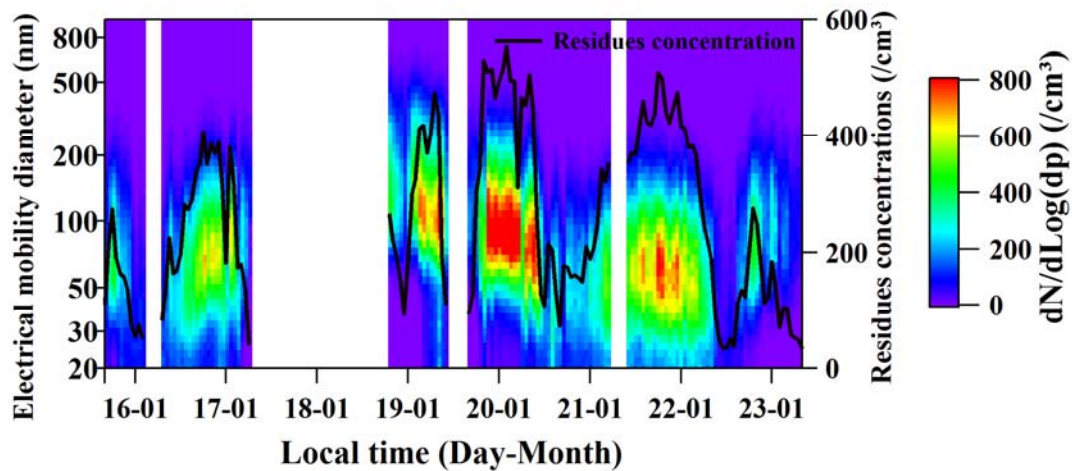

23

24 Figure S2: Size distribution and concentration (electrical mobility diameter 20-900 nm) of cloud  
 25 residues was measured a scanning mobility particle sizer (SMPS). The data was corrected by  
 26 enrichment factor of 5.25. Note that the SMPS occurred a failure on 02:00 -07:00 16 January and  
 27 the system was set up manually switched method on 08:00 - 09:00 21 January.

28

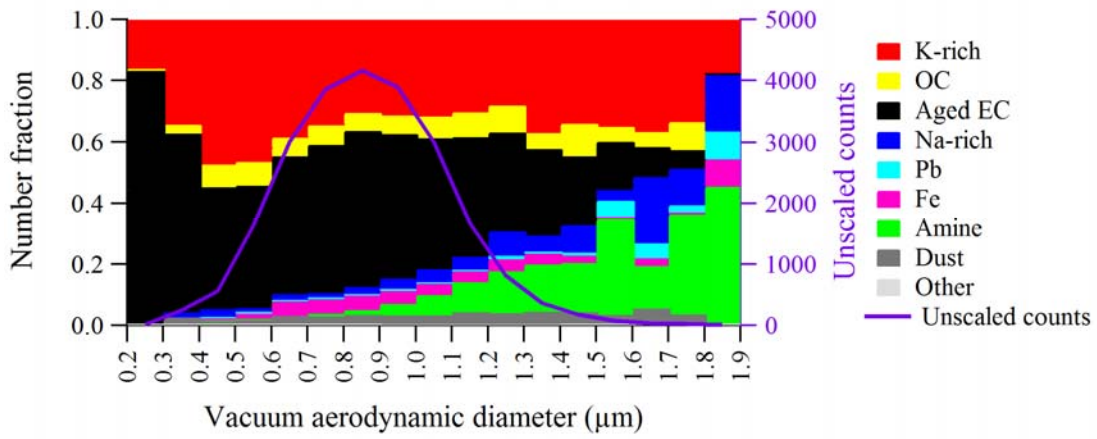

29

30 Figure S3: Number fraction for size distribution of cloud residual types.

31

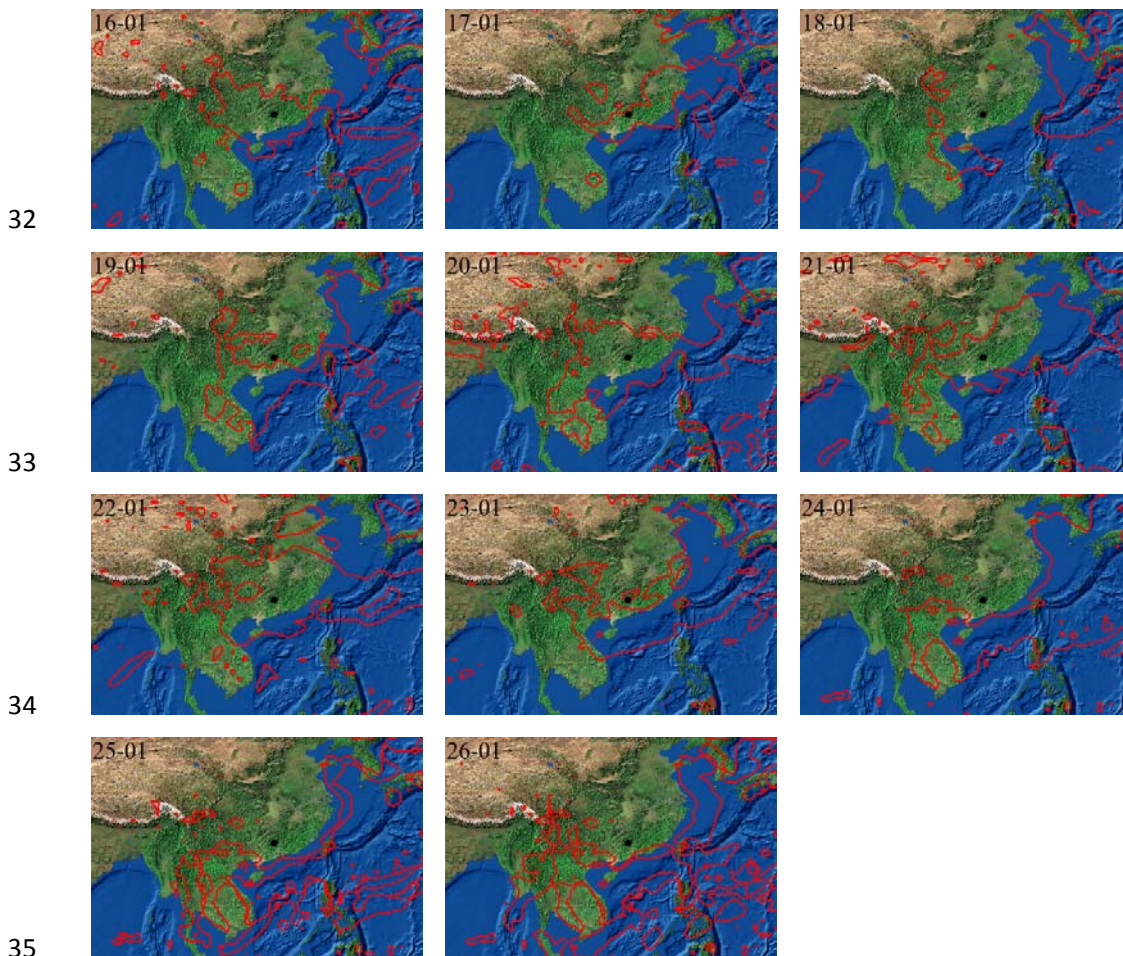

36 Figure S4: Contour lines (red lines) of relative humidity 90% at 850 hPa (about 1,500 m  
37 a.s.l). Data is available at <ftp://arlftp.arlhq.noaa.gov/pub/archives/gdas1/>.

38

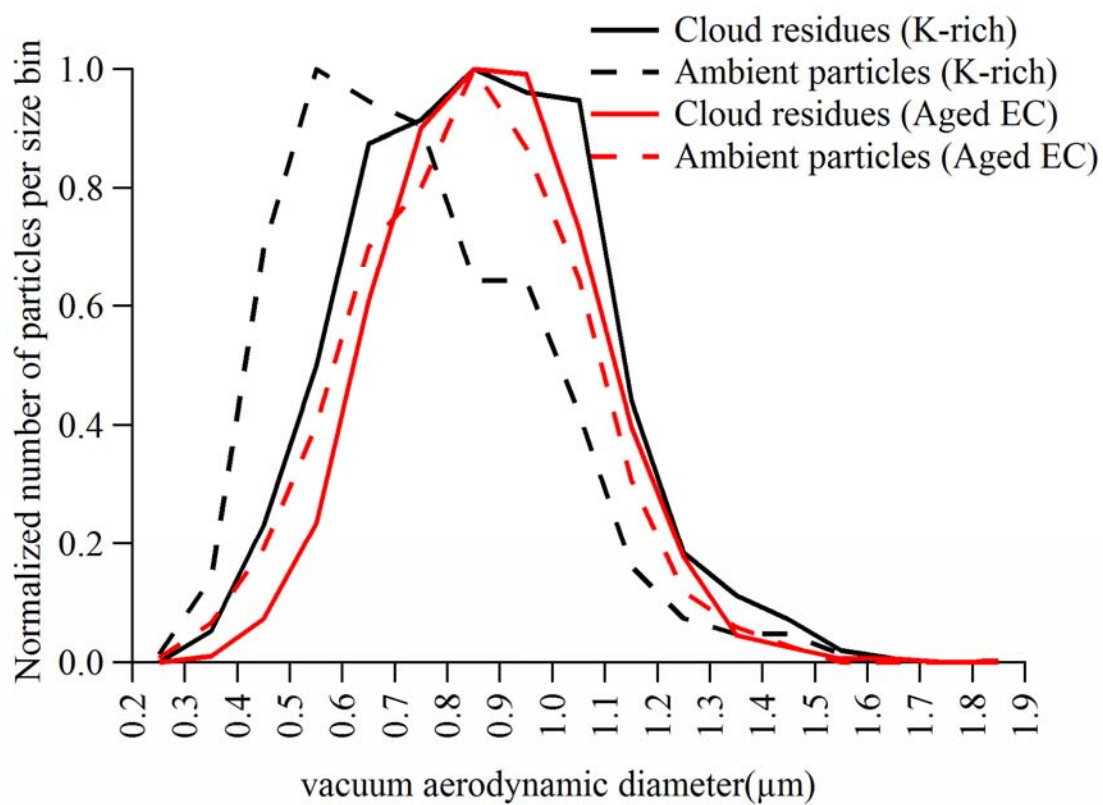

39

40 Figure S5. Size distributions of the K-rich and EC type for the comparison of cloud residual  
 41 and ambient particles.

42

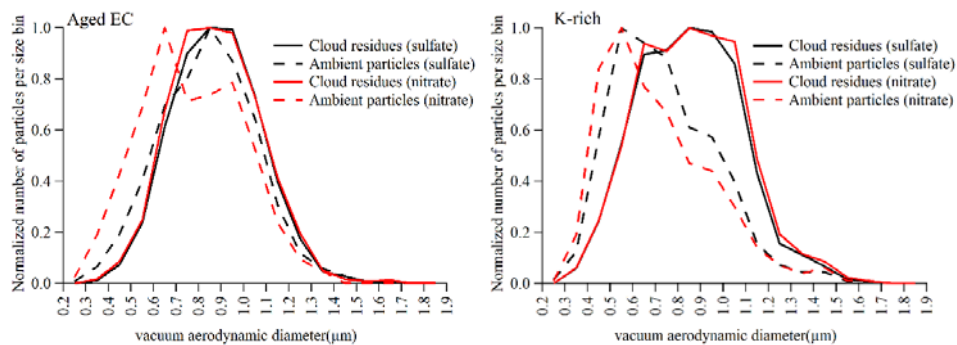

43

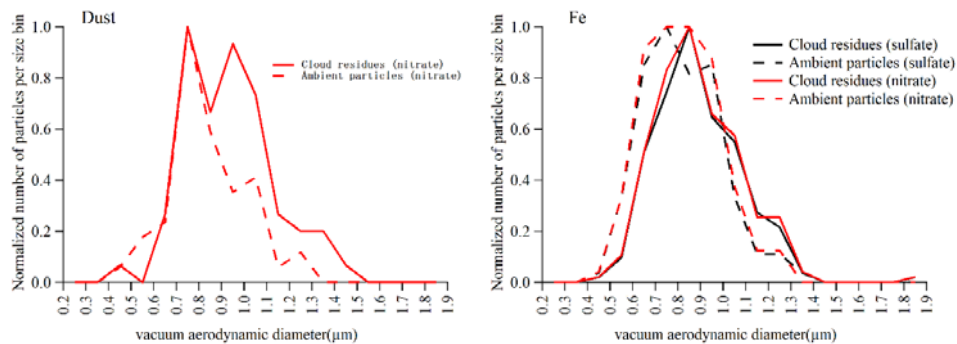

44

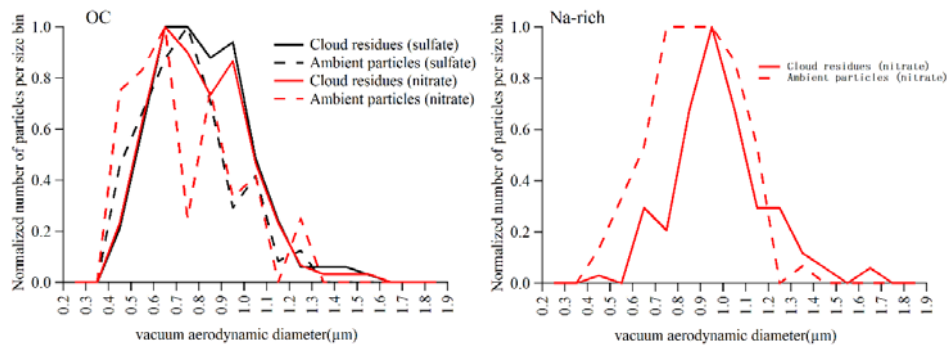

45

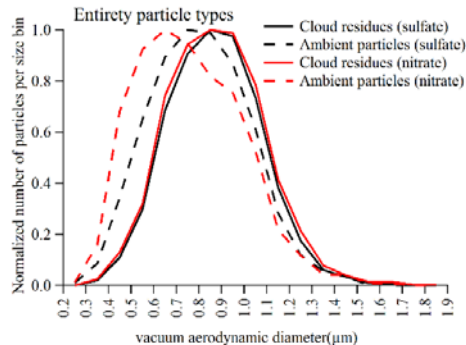

46

47 Figure S6: Size distributions of sulfate- and nitrate-containing cloud residual and ambient  
 48 particles. Size distribution of sulfate- containing particles in the Na-rich and dust particle  
 49 types was not conducted due to the low number sulfate-containing particles of the two  
 50 types.

51

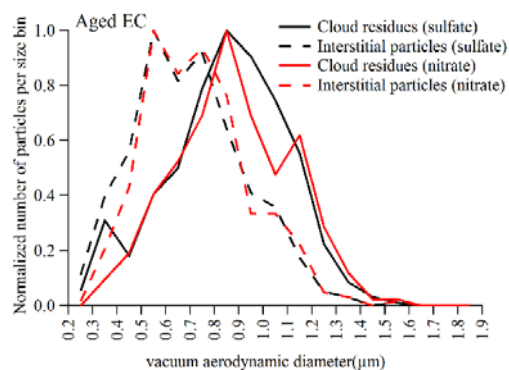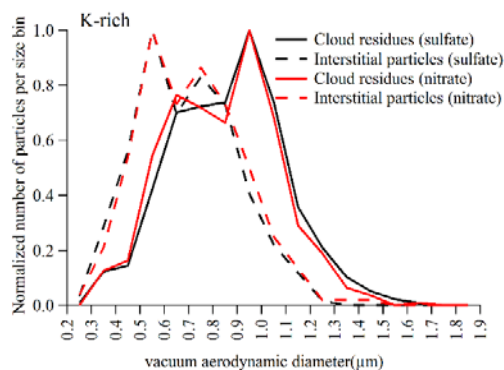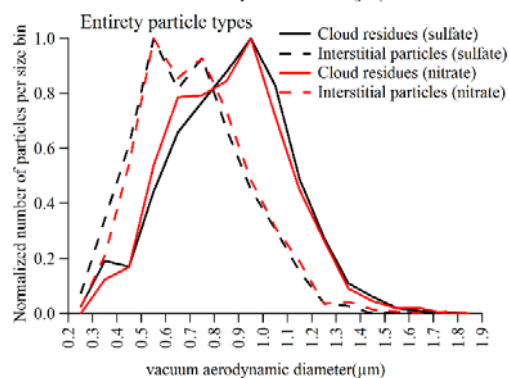

52

53

54 Figure S7: Size distributions of sulfate- and nitrate-containing particles for the EC and K-  
 55 rich cloud residual and interstitial particles. The remainder of the particle types was not  
 56 presented due to insufficient number particles.

57
